# Supplementary material for: In vitro evaluation of novel low-pressure spark plasma sintered HA–BG composite scaffolds for bone tissue engineering
Source: Royal Society of Chemistry journal article supplement (doi:10.1039/d0ra04227g), 2020-01-01
Supplement: d0ra04227g2.pdf [file d0ra04227g2.pdf]

Supporting information for

# An In Vitro Evaluation of Novel Low-Pressure Spark Plasma Sintered HA-BG Composite Scaffolds for Bone Tissue Engineering

Muhammad Rizwan<sup>a§</sup>, Krishnamurithy Genasan<sup>b§\*</sup>, Murali Malliga Raman<sup>b</sup>, Hanumantha Rao Balaji Raghavendran<sup>b</sup>, Rodianah Alias<sup>c</sup>, Yi Ying Cheok<sup>d</sup>, Won Fen Wong<sup>d</sup>, Azura Mansor<sup>b</sup>, Tunku Kamarul<sup>b</sup>, M. Hamdi<sup>ef</sup>, Wan Jeffrey Basirun<sup>g</sup>

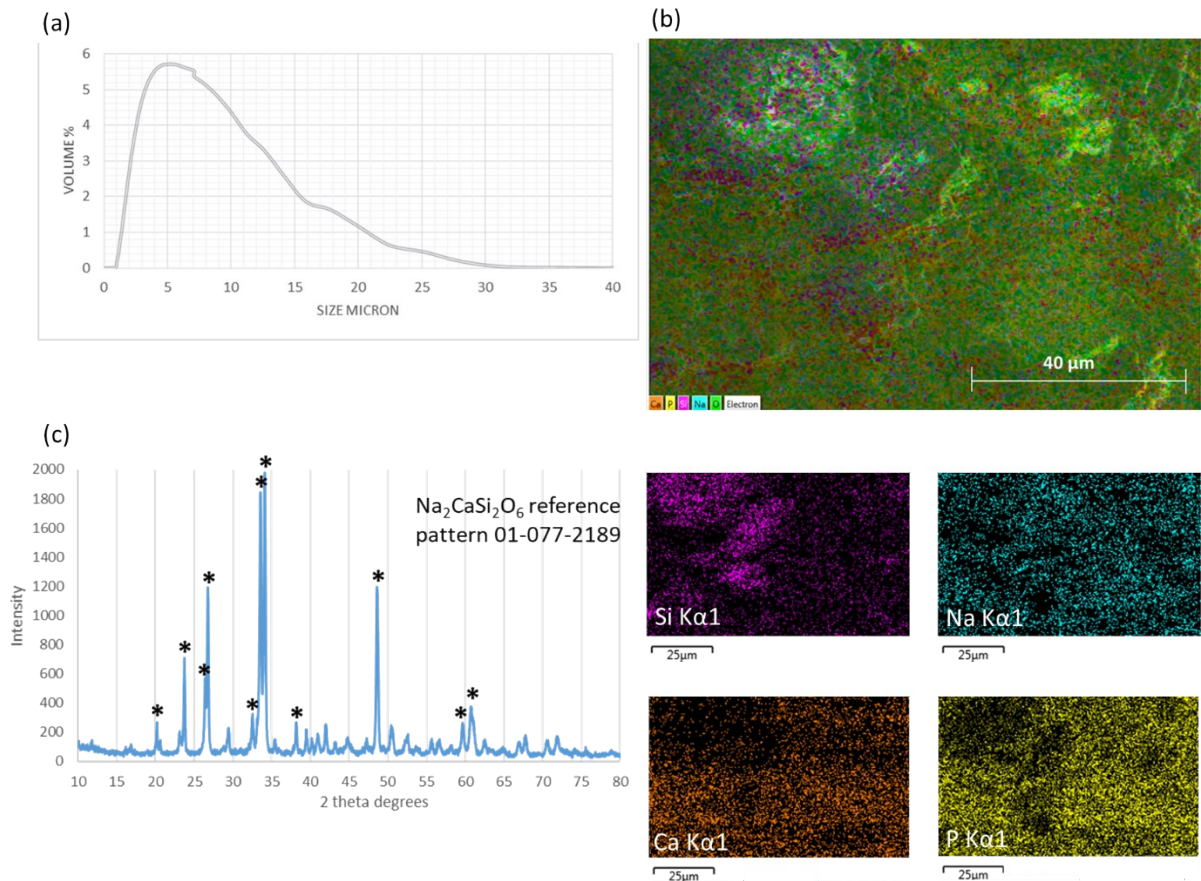

**Figure S1: Physiochemical characteristics.** (a) Ball milled bioglass particle size distribution, (b) Elemental mapping of HB 20 S and (c) XRD pattern of bioglass.

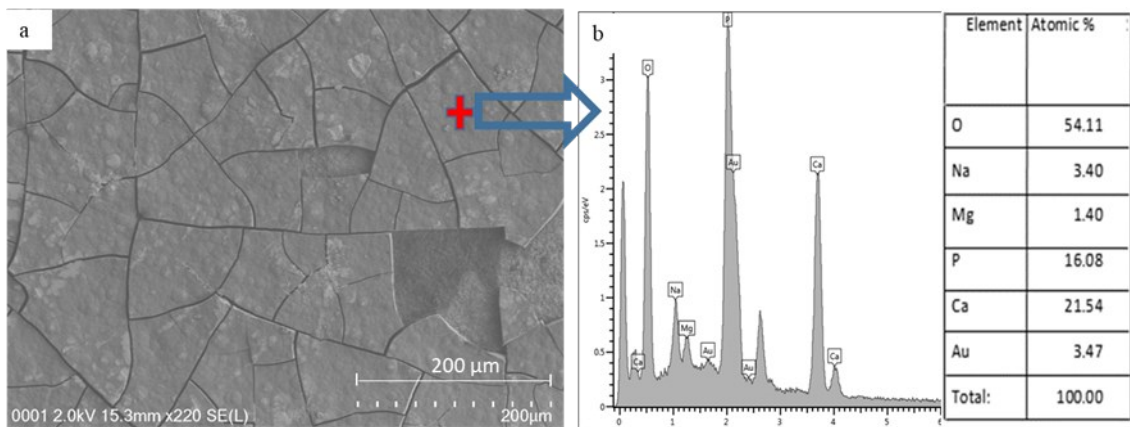

**Figure S2: The *In vitro* bioactivity analysis on HB 0 S.** (a) FESEM image of apatite layer and (b) EDAX spectra.

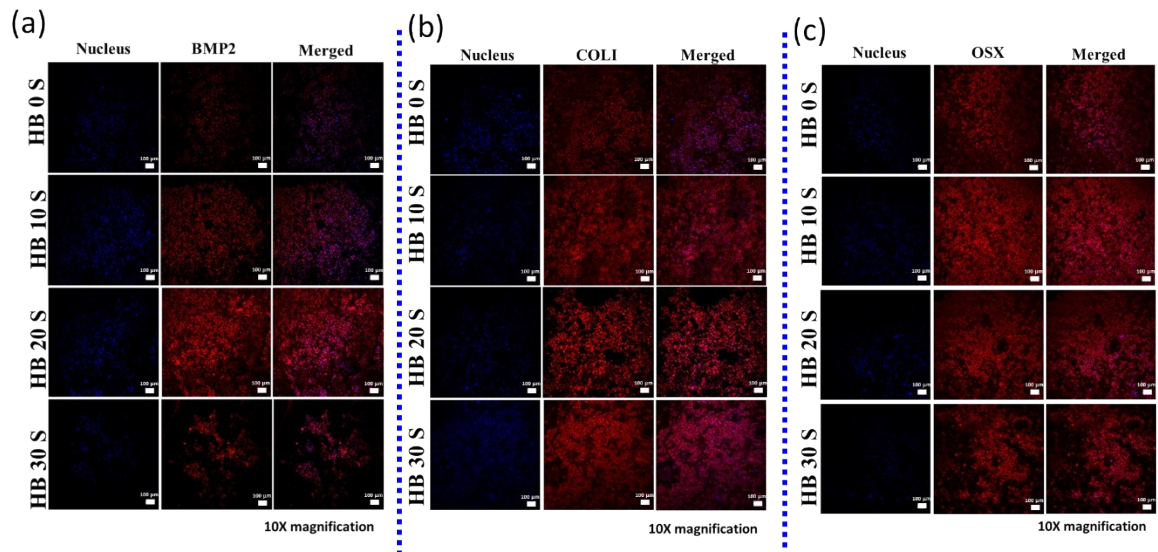

**Figure S3: Confocal images of the osteogenic intra-and extra-cellular proteins secreted on the periphery of HA-BG composite scaffolds seeded hBMSCs. (a) Bone morphogenetic protein-2 (BMP2), (b) Type-1 collagen (COL1) and (c) Osterix (OSX). (Images: 10X magnification).**

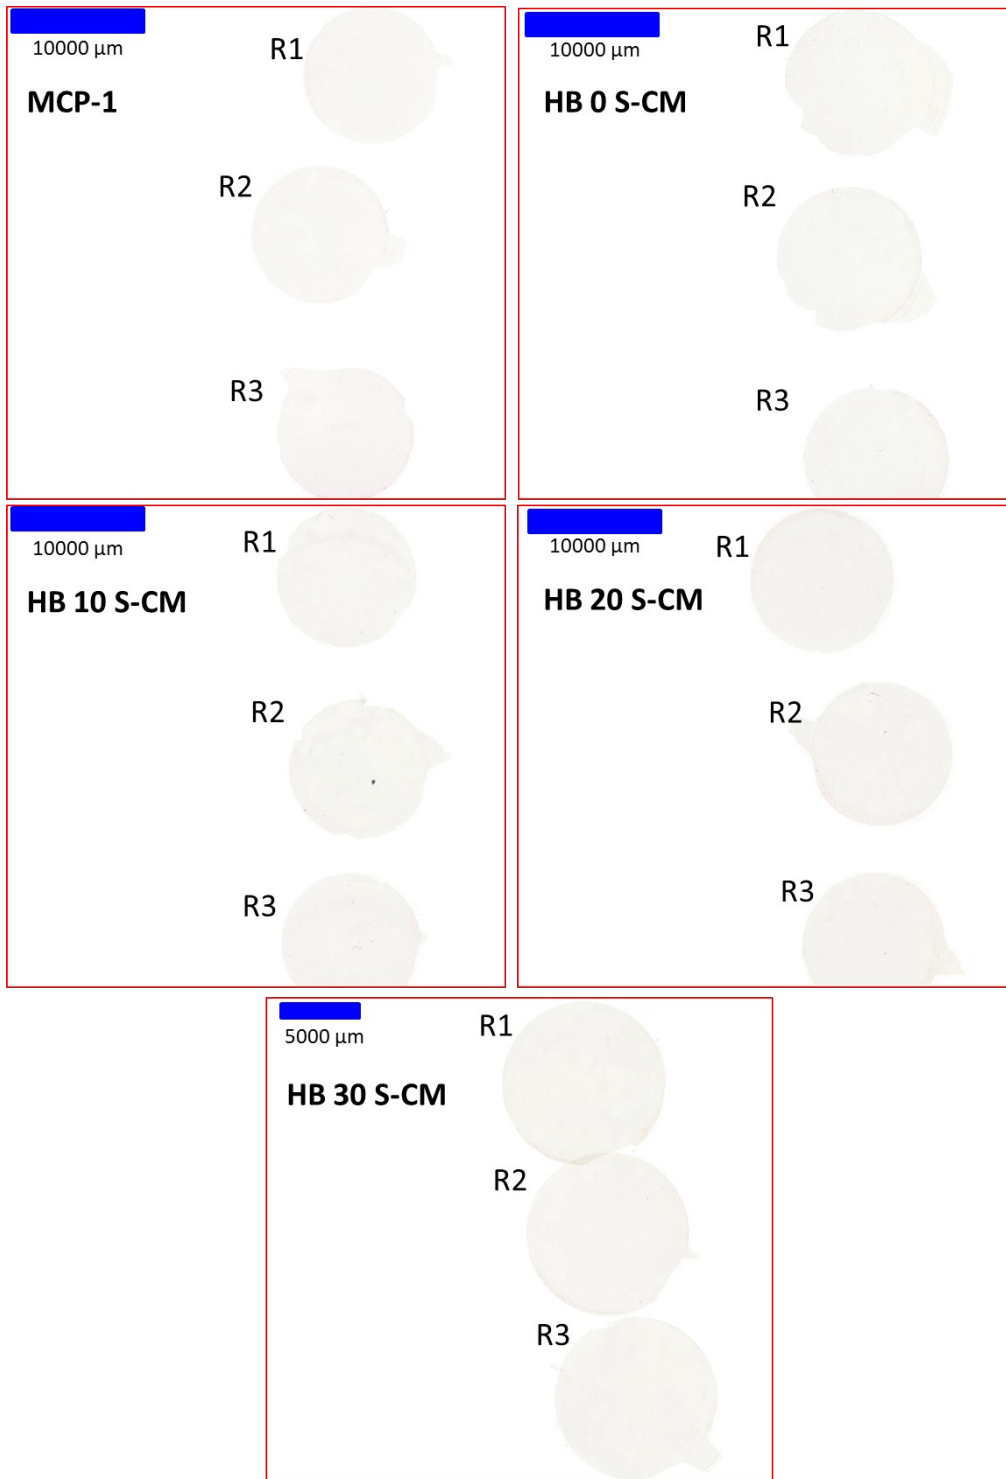

**Figure S4: Haematoxylin and Eosin (H&E) stained insert membrane (IM) retrieved after 3 hours migration assay.** The monocyte migrating out from the 3-µm pores onto basolateral site of IM in response to HB 0 S-CM, HB 10 S-CM, HB 20 S-CM and HB 30 S-CM. Monocyte Chemoattractant Protein-1 (MCP-1) was used as a positive control. The experiment was run in triplicate. The images were captured and analysed using Digital Slide Viewer (CaseViewer 2.3).

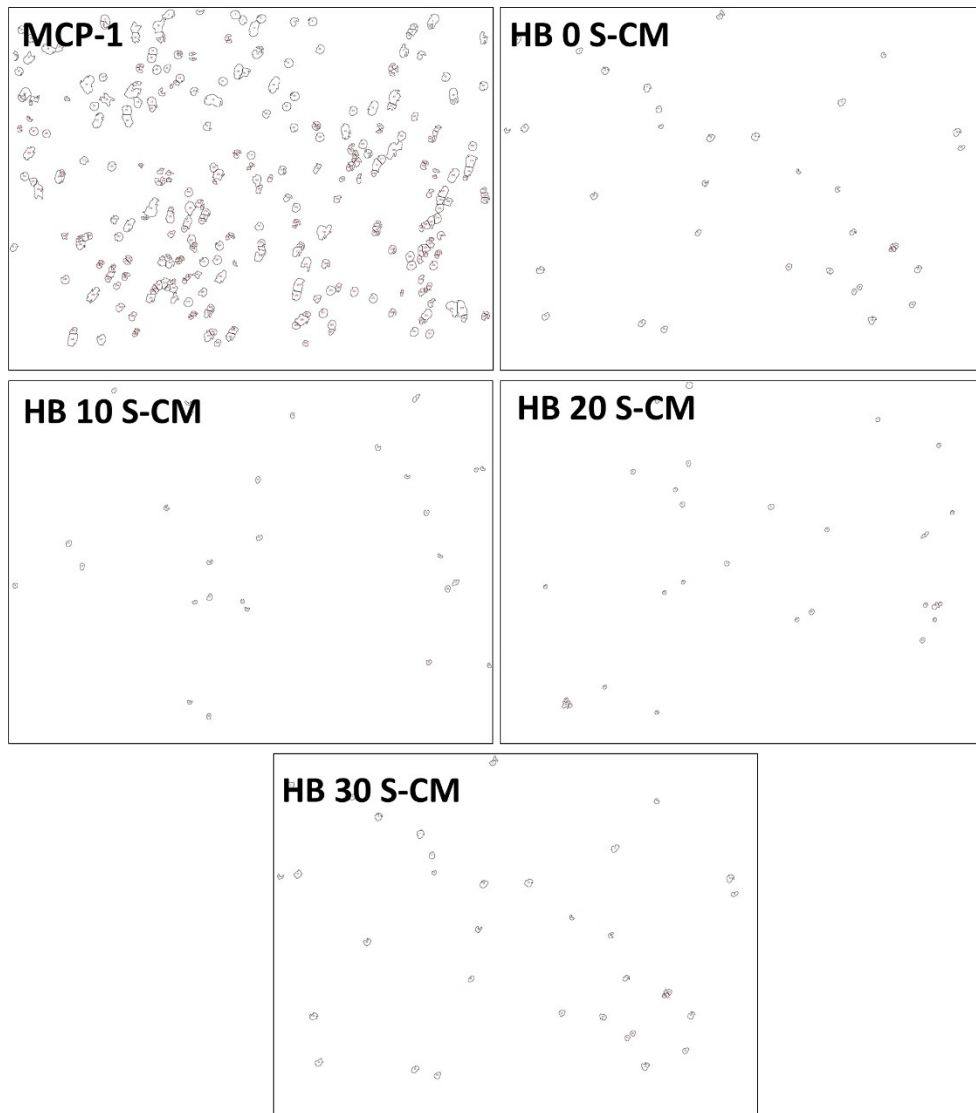

**Figure S5: Post analysis of bright field images of migrated monocytes using Image-J analysis tool with an established plugin.** These monocytes migrated in response to different stimuli including Monocyte Chemoattractant Protein-1 (MCP-1, positive control), HB 0 S-CM, HB 10 S-CM, HB 20 S-CM and HB 30 S-CM.
